# Supplementary material for: Electrochemical reduction of CO 2 on CoNi nanoparticles supported on different carbon matrixes
Source: Research Square preprint supplement (doi:10.21203/rs.3.rs-6823214/v1), 2025-07-11
Supplement: Supplementary file 1 [file f7834ec232f6ec997e545fc8.docx]

**Electrochemical reduction of CO2 on CoNi nanoparticles supported on different carbon matrixes**

Jhon Faber Zapata Cardona1,2 #, Julieta Carballo3, Gonzalo Montiel4, Mariano M. Bruno2, Federico A. Viva1,2


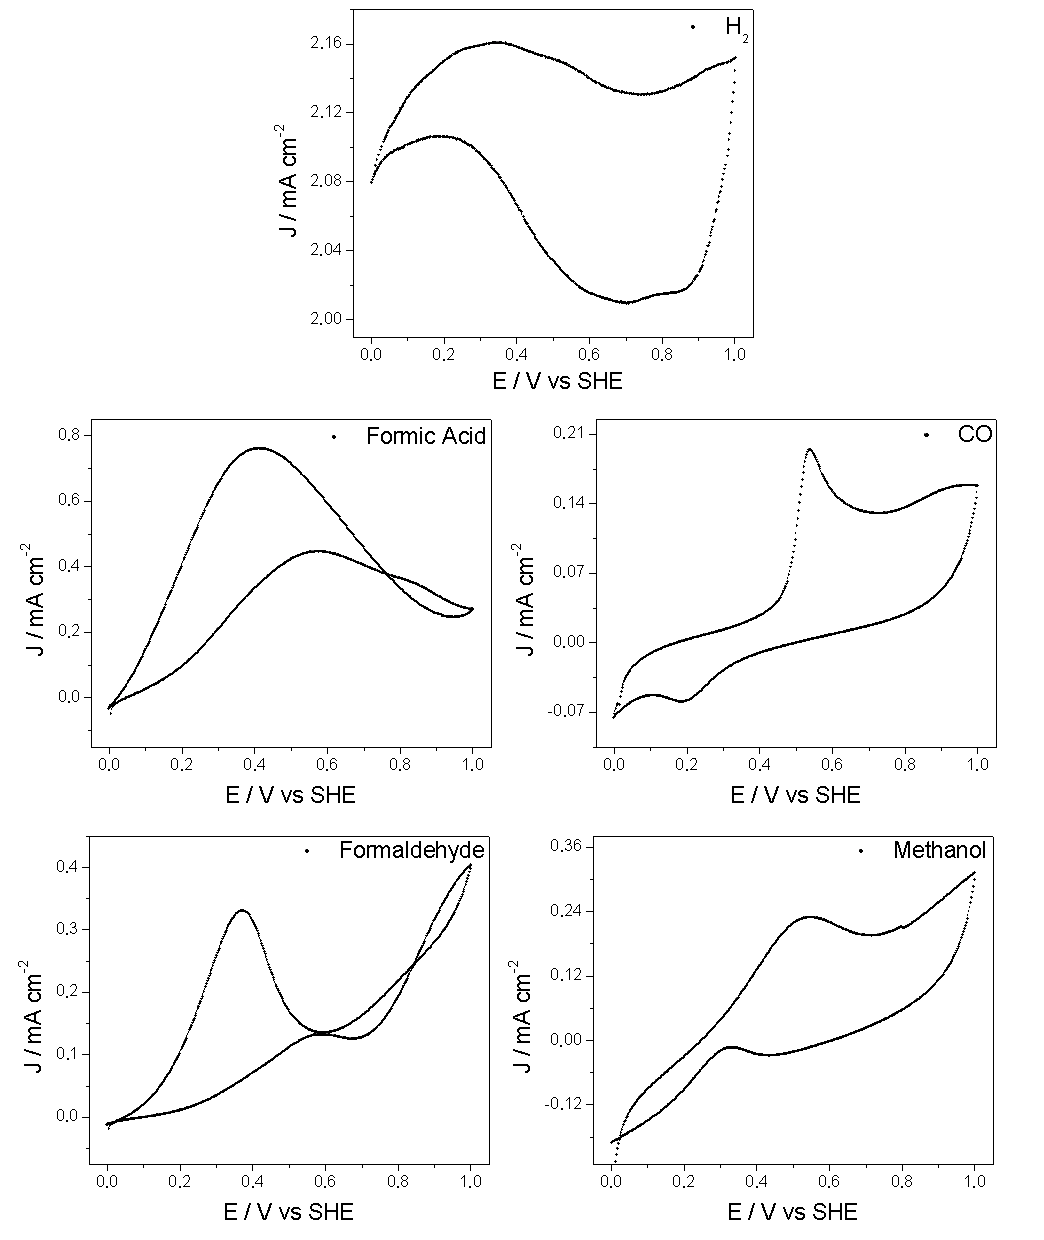


SI-Figure 1. Cyclic voltammetry of standard solution for the possible CO2 electroreduction products in 0.1 M KHCO3 saturated with CO2. The ring electrode (Pt) was swept between 0.0V and 1.0 V vs SHE at a rotation rate of 900 rmp and a sweep speed of 50 mV s-1.


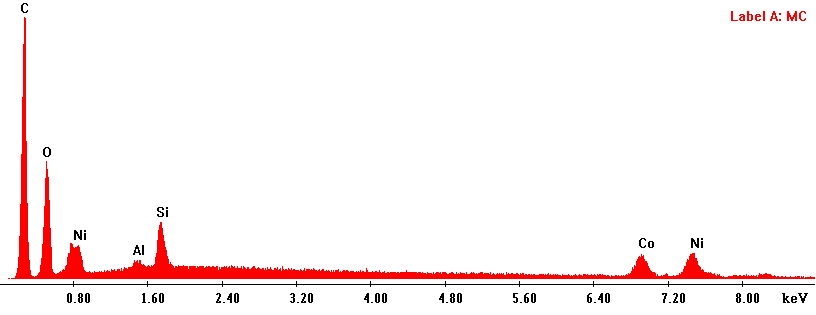


SI-Figure 2. EDX spectra of Co-Ni catalyst on mesoporous carbon.


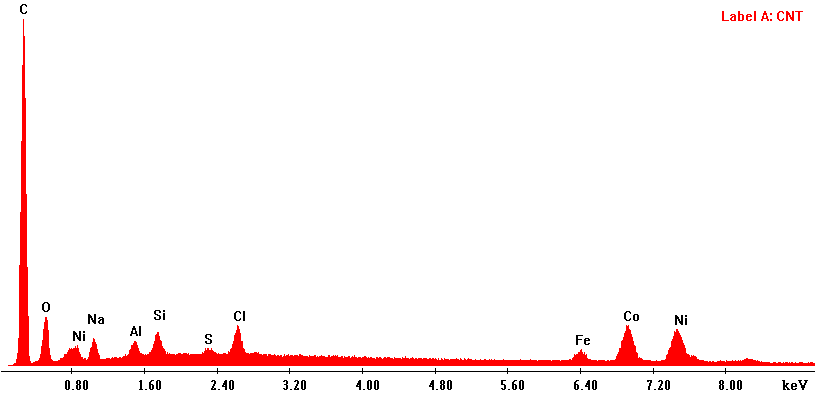


SI-Figure 3. EDX spectra of Co-Ni catalyst on carbon nanotubes.

.
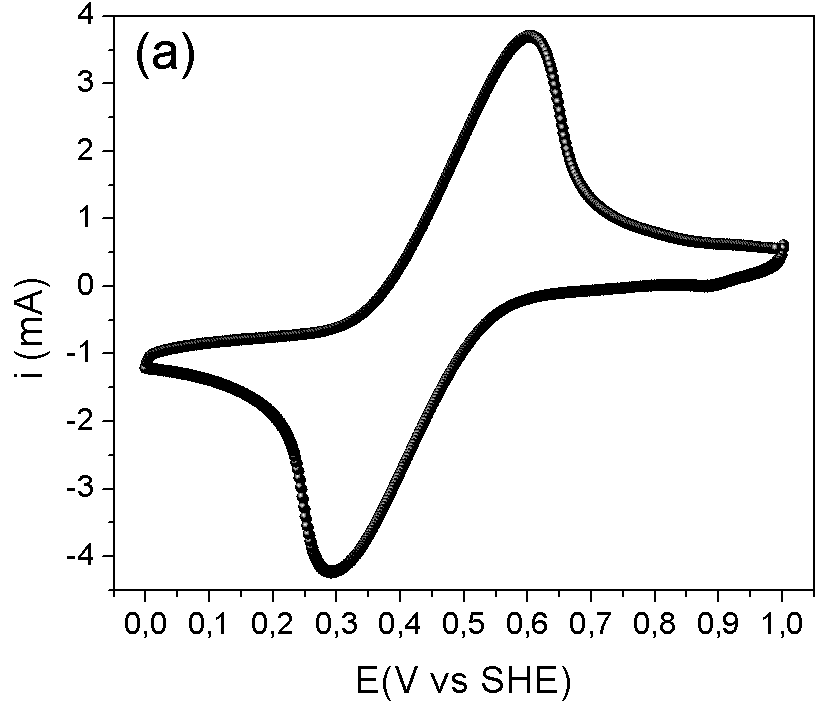

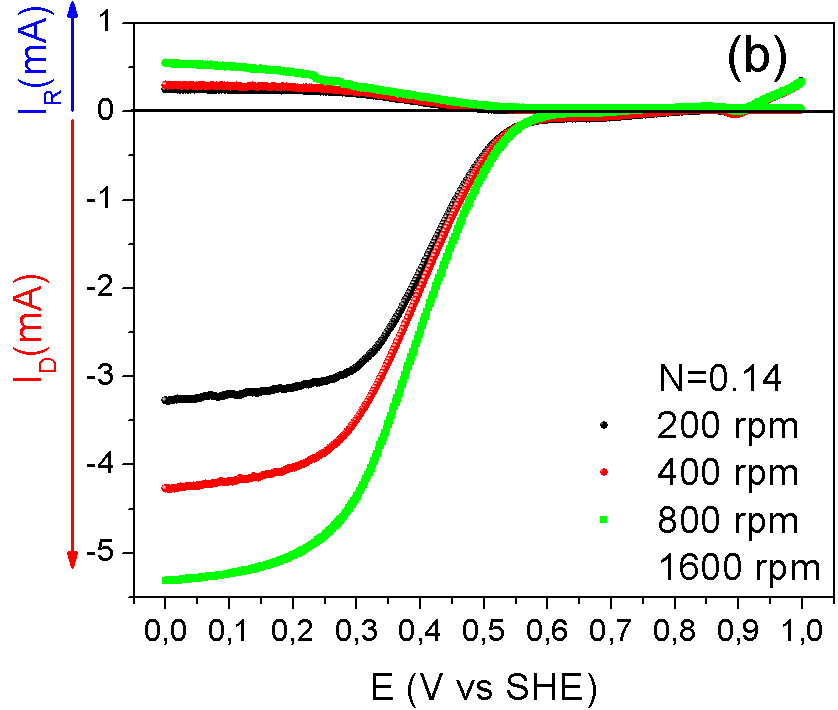


SI-Figure 4. a)Cyclic voltammogram of the ferro/ferri couple in CoNi/MC at a potential between 0 and 1 V vs SHE a 50 mVs-1. b) Linear voltammetry on the disk and the ring at different speeds of rotation.


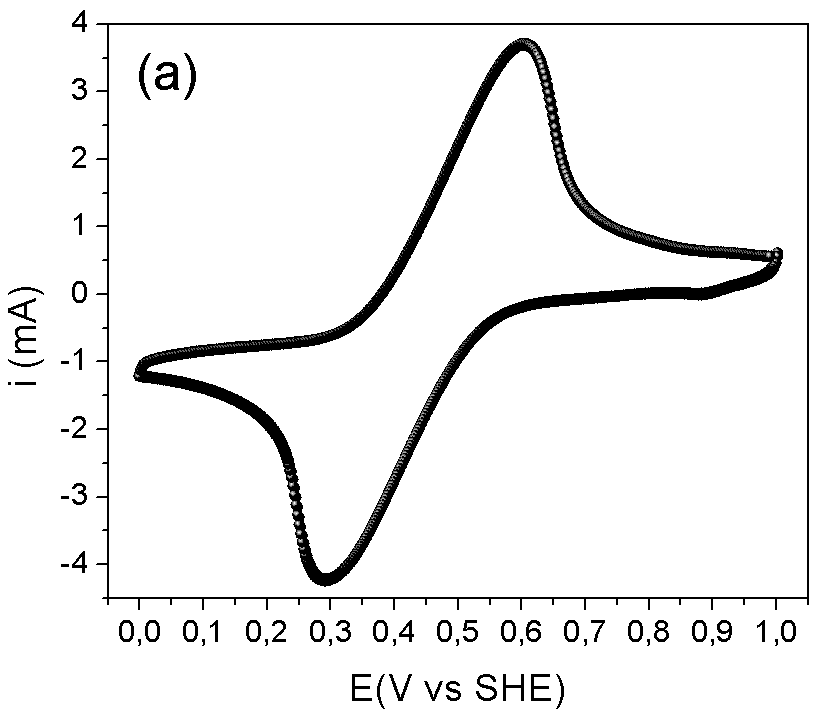

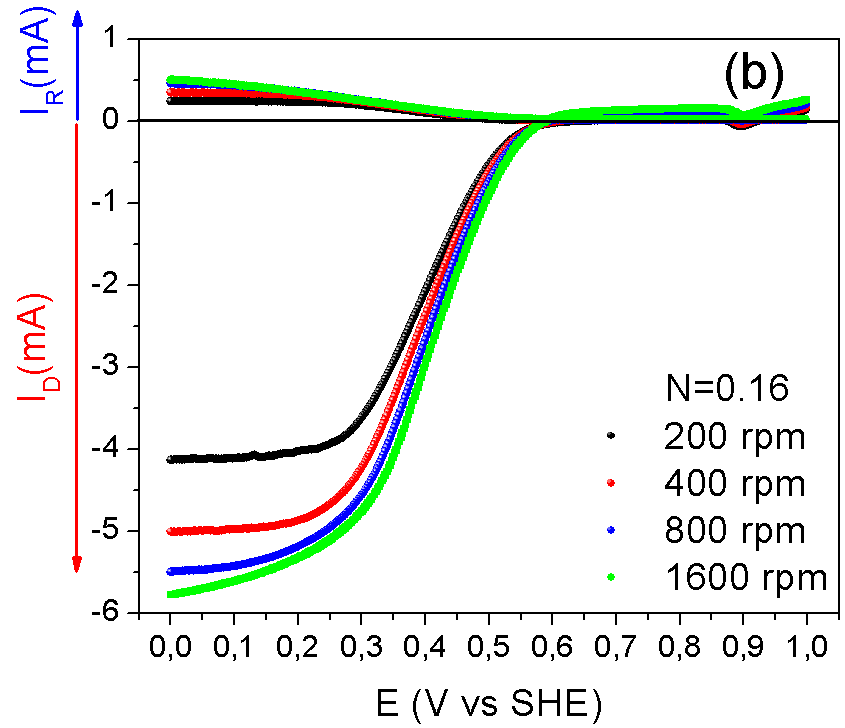


SI-Figure 5. a)Cyclic voltammogram of the ferro/ferri couple in CoNi/CNT at a potential between 0 and 1 V vs SHE a 50 mVs-1 b) Linear voltammetry on the disk and the ring at different speeds of rotation.
